# Supplementary material for: SOAT1 methylation is associated with coronary heart disease
Source: Lipids Health Dis. 2019 Nov 4;18:192. doi: 10.1186/s12944-019-1138-9 (PMC6829990; doi:10.1186/s12944-019-1138-9)
Supplement: Supplementary file 1 — Additional file 1: Table S1: Primer sequences used for PCR. Table S2: Methylated CpG sites identified in this study. Table S3: Distribution of methylation levels (%) of 142 CpGs sites in candidate genes. [file 12944_2019_1138_MOESM1_ESM.xls]

## Sheet: TableS1
Table S1 Primer sequences used for PCR
Gene	PCR size(bp)	Start site	End site	Primer
FLOT1 1	222	-368	-589	1forward	AAAACCCATCCTTTCCCTTTC
				1reverse	AGGGAGAGAGGGGAAAGGT
FLOT1_2	258	-37	220	2forward	TTTAGTYGGGTTGTTTGGTTAGTT
				2reverse	CCTAAAATCACAAAACCCAACATC
FLOT1_3	191	1098	1288	3forward	GGGTGTTGTTGGAGGAAAGTG
				3reverse	CTACTCACCATCRTCTTCTACCAAATC
FLOT1_4	257	1350	1606	4forward	GGGGAGATAAAATAGGAGATAGGTT
				4reverse	CCTCCACCATCCCRAAAC
FLOT2	181	-27	-207	forward	CCTCCACAACTCCCACCT
				reverse	GGGGTGGYGGGATAGGTT
LIMA1	262	-131	130	forward	TTTTTGYGTTGTTATTAGTTTTGTTATAGGT
				reverse	CCRAACAACAAAAACCCTATCC
SOAT1_1	260	7	-252	1forward	CCCCTACAACTCCATACTACCAC
				1reverse	TTTTATTGGTGGTTTTTAGGTTGTT
SOAT1_2	248	1172	925	2forward	TCTTATACCTCAACCTCCTAAATAACTAAAA
				2reverse	AAAAAGTGGTTTAAATAGGTGGTAGTT

## Sheet: TableS2
			Table S2 Methylated CpG sites identified in this study
			Gene	Position	Genomic location	Relative to TSS,bp
			FLOT1_1	35	Chr6: 30710226	402
				37	Chr6:30710224	404
				60	Chr6: 30710201	427
				63	Chr6: 30710198	430
				85	Chr6: 30710176	452
				91	Chr6: 30710170	458
				142	Chr6: 30710119	509
				165	Chr6: 30710096	532
				170	Chr6: 30710091	537
				175	Chr6: 30710086	542
				199	Chr6: 30710062	566
			FLOT1_2	25	Chr6: 30710615	13
				46	Chr6: 30710636	-8
				58	Chr6: 30710648	-20
				72	Chr6: 30710662	-34
				81	Chr6: 30710671	-43
				87	Chr6: 30710677	-49
				90	Chr6: 30710680	-52
				92	Chr6: 30710682	-54
				97	Chr6: 30710687	-59
				102	Chr6: 30710692	-64
				108	Chr6: 30710698	-70
				128	Chr6: 30710718	-90
				143	Chr6: 30710733	-105
				165	Chr6: 30710755	-127
				171	Chr6: 30710761	-133
				174	Chr6: 30710764	-136
				176	Chr6: 30710766	-138
				198	Chr6: 30710788	-160
				226	Chr6: 30710816	-188
				233	Chr6: 30710823	-195
			FLOT1_3	35	Chr6: 30711760	-1132
				42	Chr6: 30711767	-1139
				51	Chr6: 30711776	-1148
				71	Chr6: 30711796	-1168
				77	Chr6: 30711802	-1174
				80	Chr6: 30711805	-1177
				96	Chr6: 30711821	-1193
				107	Chr6: 30711832	-1204
				110	Chr6: 30711835	-1207
				119	Chr6: 30711844	-1216
				138	Chr6: 30711863	-1235
				141	Chr6: 30711866	-1238
			FLOT1_4	30	Chr6: 30712007	-1379
				45	Chr6: 30712022	-1394
				50	Chr6: 30712027	-1399
				74	Chr6: 30712051	-1423
				81	Chr6: 30712058	-1430
				83	Chr6: 30712060	-1432
				96	Chr6: 30712073	-1445
				99	Chr6: 30712076	-1448
				113	Chr6: 30712090	-1462
				131	Chr6: 30712108	-1480
				137	Chr6: 30712114	-1486
				143	Chr6: 30712120	-1492
				150	Chr6: 30712127	-1499
				152	Chr6: 30712129	-1501
				159	Chr6: 30712136	-1508
				167	Chr6: 30712144	-1516
				171	Chr6: 30712148	-1520
				181	Chr6: 30712158	-1530
				186	Chr6: 30712163	-1535
				193	Chr6: 30712170	-1542
				204	Chr6: 30712181	-1553
				225	Chr6: 30712202	-1574
				233	Chr6: 30712210	-1582
				236	Chr6: 30712213	-1585
			FLOT2	22	Chr17:27224667	48
				24	Chr17:27224665	50
				28	Chr17:27224661	54
				31	Chr17:27224658	57
				42	Chr17:27224647	68
				55	Chr17:27224634	81
				65	Chr17:27224624	91
				71	Chr17:27224618	97
				82	Chr17:27224607	108
				87	Chr17:27224602	113
				90	Chr17:27224599	116
				93	Chr17:27224596	119
				113	Chr17:27224576	139
				126	Chr17:27224563	152
				131	Chr17:27224558	157
				155	Chr17:27224534	181
				158	Chr17:27224531	184
			SOAT1_1	32	Chr1:179262824	-24
				44	Chr1:179262812	-36
				54	Chr1:179262802	-46
				58	Chr1:179262798	-50
				60	Chr1:179262796	-52
				62	Chr1:179262794	-54
				70	Chr1:179262786	-62
				73	Chr1:179262783	-65
				83	Chr1:179262773	-75
				124	Chr1:179262732	-116
				139	Chr1:179262717	-131
				142	Chr1:179262714	-134
				195	Chr1:179262661	-187
				203	Chr1:179262653	-195
				222	Chr1:179262634	-214
				227	Chr1:179262629	-219
			SOAT1_2	61	Chr1:179263960	1112
				63	Chr1:179263958	1110
				73	Chr1:179263948	1100
				101	Chr1:179263920	1072
				106	Chr1:179263915	1067
				110	Chr1:179263911	1063
				165	Chr1:179263856	1008
				197	Chr1:179263824	976
				205	Chr1:179263816	968
				209	Chr1:179263812	964

## Sheet: TableS3
			Table S3 Distribution of methylation levels (%) of 142 CpGs sites in candidate genes
			Gene	Position	Min	Median	Max	Level(%)
			FLOT1_1	35	0.00181	0.0251	0.00181	2.5
			FLOT1_1	37	0.00193	0.00923	0.00193	1
			FLOT1_1	60	0.00168	0.00768	0.00168	0.8
			FLOT1_1	63	0.00299	0.01145	0.00299	1.2
			FLOT1_1	85	0.00983	0.01981	0.00983	2
			FLOT1_1	91	0.03755	0.04586	0.03755	4.6
			FLOT1_1	142	0.00689	0.01461	0.00689	1.5
			FLOT1_1	165	0.00545	0.01344	0.00545	1.4
			FLOT1_1	170	0	0.01376	0	1.4
			FLOT1_1	175	0	0.01802	0	1.9
			FLOT1_1	199	0.00196	0.00731	0.00196	0.8
			FLOT1_2	25	0	0.00646	0	1
			FLOT1_2	46	0	0.00827	0	0.9
			FLOT1_2	58	0	0.00733	0	1
			FLOT1_2	72	0	0.00674	0	0.7
			FLOT1_2	81	0.00095	0.00823	0.00095	0.8
			FLOT1_2	87	0	0.00617	0	0.7
			FLOT1_2	90	0.00193	0.00917	0.00193	0.9
			FLOT1_2	92	0	0.00651	0	0.7
			FLOT1_2	97	0	0.00618	0	0.6
			FLOT1_2	102	0	0.00745	0	0.8
			FLOT1_2	108	0	0.00366	0	0.6
			FLOT1_2	128	0	0.00865	0	0.9
			FLOT1_2	143	0.00173	0.00749	0.00173	0.8
			FLOT1_2	165	0	0.00614	0	0.6
			FLOT1_2	171	0	0.00729	0	0.7
			FLOT1_2	174	0.00158	0.00993	0.00158	1.1
			FLOT1_2	176	0.00118	0.00639	0.00118	0.7
			FLOT1_2	198	0	0.01022	0	1.1
			FLOT1_2	226	0	0.00667	0	0.8
			FLOT1_2	233	0	0.00751	0	0.8
			FLOT1_3	35	0	0.06741	0	6.9
			FLOT1_3	42	0	0.00812	0	1
			FLOT1_3	51	0	0.02181	0	2.3
			FLOT1_3	71	0	0.01546	0	1.6
			FLOT1_3	77	0	0.02562	0	3
			FLOT1_3	80	0	0.01243	0	1.2
			FLOT1_3	96	0	0.02224	0	2.2
			FLOT1_3	107	0	0.00817	0	0.8
			FLOT1_3	110	0	0.00979	0	1
			FLOT1_3	119	0	0.00778	0	0.8
			FLOT1_3	138	0	0.00809	0	0.9
			FLOT1_3	141	0	0.00821	0	0.9
			FLOT1_4	30	0	0.00508	0	1.4
			FLOT1_4	45	0	0.00238	0	0.4
			FLOT1_4	50	0	0.00501	0	0.6
			FLOT1_4	74	0	0.00565	0	0.8
			FLOT1_4	81	0	0.00565	0	0.8
			FLOT1_4	83	0	0.00543	0	0.6
			FLOT1_4	96	0	0.00365	0	0.8
			FLOT1_4	99	0	0.00402	0	0.6
			FLOT1_4	113	0	0.02479	0	2.5
			FLOT1_4	131	0.04386	0.0702	0.04386	7.1
			FLOT1_4	137	0.0404	0.07231	0.0404	7.5
			FLOT1_4	143	0	0.02917	0	2.9
			FLOT1_4	150	0	0.03846	0	3.9
			FLOT1_4	152	0.01613	0.09568	0.01613	9.4
			FLOT1_4	159	0.07377	0.13225	0.07377	13.2
			FLOT1_4	167	0.04706	0.12117	0.04706	11.9
			FLOT1_4	171	0	0.03438	0	3.4
			FLOT1_4	181	0	0.03901	0	4
			FLOT1_4	186	0	0.02347	0	2.6
			FLOT1_4	193	0	0.0137	0	2.1
			FLOT1_4	204	0	0.0146	0	1.5
			FLOT1_4	225	0	0.00634	0	0.9
			FLOT1_4	233	0	0.00767	0	1.1
			FLOT1_4	236	0	0.01333	0	1.8
			FLOT2_	22	0	0.00806	0	1
			FLOT2_	24	0	0.006	0	0.7
			FLOT2_	28	0	0.00794	0	0.9
			FLOT2_	31	0	0.00667	0	0.8
			FLOT2_	42	0.00855	0.02418	0.00855	2.6
			FLOT2_	55	0	0.03383	0	3.4
			FLOT2_	65	0.01567	0.03846	0.01567	3.8
			FLOT2_	71	0.00417	0.01669	0.00417	1.9
			FLOT2_	82	0.00267	0.01299	0.00267	1.4
			FLOT2_	87	0	0.01955	0	2
			FLOT2_	90	0	0.02088	0	2.2
			FLOT2_	93	0	0.02985	0	3
			FLOT2_	113	0	0.00888	0	1
			FLOT2_	126	0	0.00672	0	0.8
			FLOT2_	131	0	0.01373	0	1.4
			FLOT2_	155	0	0.01474	0	1.7
			FLOT2_	158	0	0.01227	0	1.4
			SOAT1_1	32	0.00196	0.00739	0.02342	0.8
			SOAT1_1	44	0.00079	0.00644	0.01634	0.7
			SOAT1_1	54	0	0.00509	0.01908	0.6
			SOAT1_1	58	0.00051	0.00547	0.01694	0.6
			SOAT1_1	60	0.00132	0.00671	0.04209	0.8
			SOAT1_1	62	0.00062	0.00474	0.01354	0.5
			SOAT1_1	70	0.00062	0.00634	0.02332	0.7
			SOAT1_1	73	0.00105	0.00554	0.02209	0.6
			SOAT1_1	83	0.0009	0.0074	0.01656	0.8
			SOAT1_1	124	0.00189	0.00661	0.0346	0.8
			SOAT1_1	139	0.00132	0.00684	0.05191	0.8
			SOAT1_1	142	0.00181	0.00717	0.0164	0.8
			SOAT1_1	195	0.00088	0.00468	0.01408	0.5
			SOAT1_1	203	0.00236	0.00792	0.03191	0.9
			SOAT1_1	222	0	0.00927	0.04737	1.1
			SOAT1_1	227	0	0.00601	0.01893	0.7
			SOAT1_2	61	0.1117	0.19654	0.25758	19.7
			SOAT1_2	63	0.00939	0.0573	0.09603	5.6
			SOAT1_2	73	0.09012	0.15829	0.20764	15.9
			SOAT1_2	101	0.00362	0.02396	0.04387	2.3
			SOAT1_2	106	0.1145	0.14356	0.16038	14.2
			SOAT1_2	110	0.07031	0.10656	0.12736	10.6
			SOAT1_2	165	0.22776	0.28689	0.3171	28.5
			SOAT1_2	197	0.15181	0.21513	0.25514	21.4
			SOAT1_2	205	0.11547	0.16526	0.20252	16.5
			SOAT1_2	209	0.12471	0.1729	0.20957	17.4
